# Supplementary material
Source: MDPI journal article supplement (https://www.mdpi.com/2571-8789/3/1/15)
Supplement: s1 [file s1]

Article

## Supplementary Information for

# Summertime Soil–Atmosphere Ammonia Exchange in the Colorado Rocky Mountain Front Range Pine Forest

Amy Hrdina <sup>1</sup>, Alexander Moravek <sup>1</sup>, Heather Schwartz-Narbonne <sup>1</sup>, and Jennifer Murphy <sup>1,\*</sup>

<sup>1</sup> Department of Chemistry, University of Toronto, 80 St. George Street, Toronto, Ontario, Canada, M5S 3H6

\* Correspondence: jen.murphy@utoronto.ca; Tel.: +1-416-946 -3011

Received: date; Accepted: date; Published: date

### S1. Additional measurements made by ambient ion monitoring system coupled with ion chromatographs (AIM-IC).

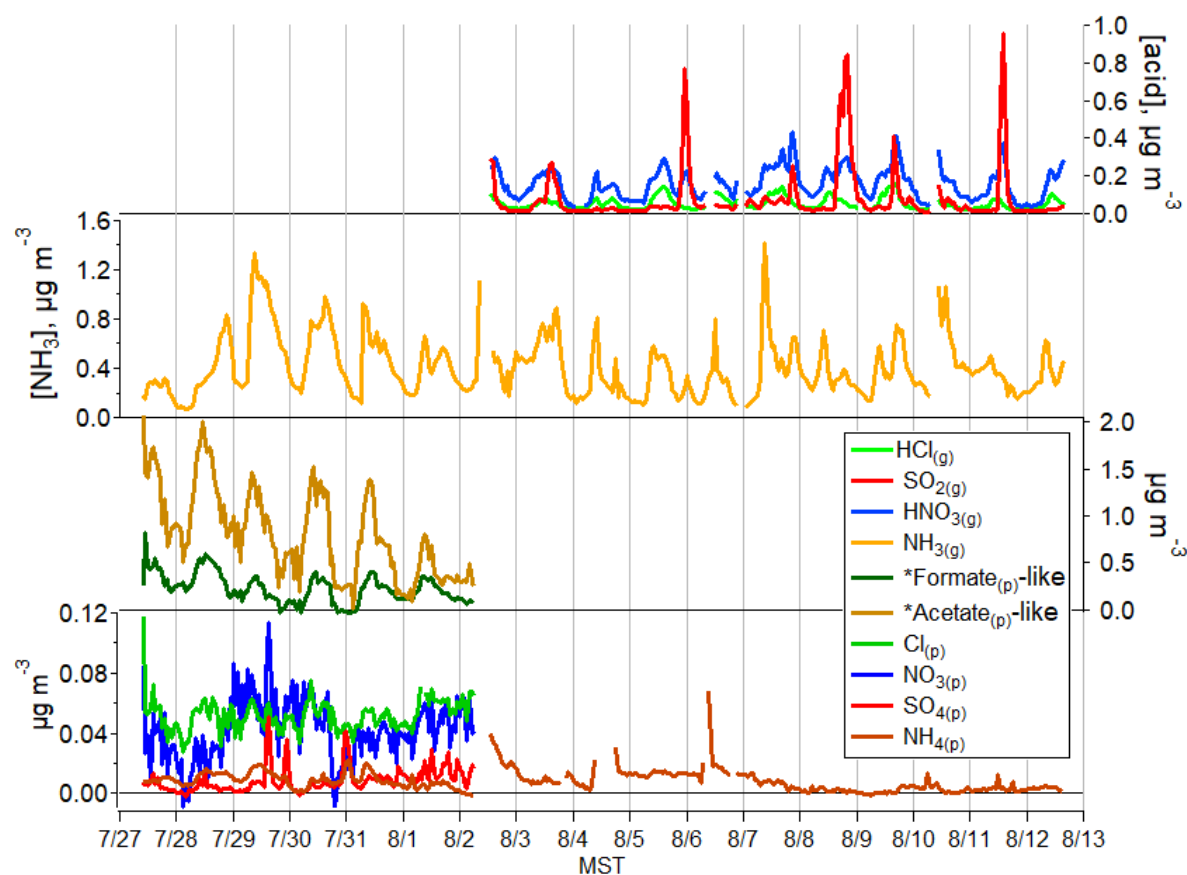

**Figure S1.** Ambient concentrations of trace gases (HCl, SO<sub>2</sub>, HNO<sub>3</sub>, and NH<sub>3</sub>) and average PM<sub>2.5</sub> composition (pCl, pNO<sub>3</sub>, pSO<sub>4</sub>, pNH<sub>4</sub>, and \*organics) observed in MEFO by the AIM-IC from 27 July to 13 August 2015.

## S2. Flux calculation based on compensation point resistance model

### S2.1. Soil fluxes and in-canopy transfer velocity

The variable  $\chi$  represents the air concentration, either as an equilibrium point in the context of a compensation point or as a measured ambient concentration, such as a mixing ratio measured by the AIM-IC. The transport velocity represents the transport of air masses through the canopy and is composed of the in-canopy aerodynamic resistance ( $R_{ac}$ ) and the quasi-laminar boundary layer resistance at the forest ground surface ( $R_{bg}$ ):

$$v_{tr} = R_{ac} + R_{bg} \quad (S1)$$

Following the approach by Shuttleworth and Wallace (1985),  $R_{ac}$  was calculated as

$$R_{ac} = \frac{h_c \cdot \left( e^n - e^{n \cdot \left( 1 - \frac{d+z_0}{h_c} \right)} \right)}{\kappa \cdot u_* \cdot n \cdot (h_c - d)}, \quad (S2)$$

where  $u_*$  is the friction velocity measured above the forest canopy and  $\kappa$  is the von Kármán constant ( $\approx 0.41$ ) [2]. The parameter  $n$  is a function of the leaf area index and described further in Massad et al. (2010).

The quasi-laminar boundary layer resistance at forest ground is given by Schuepp et al. (1977) as

$$R_{bg} = \frac{Sc - \ln\left(\frac{\delta_0}{z_l}\right)}{\kappa \cdot u_{*g}}, \quad (S3)$$

where  $\delta_0$  is the distance above ground where the molecular diffusivity of  $\text{NH}_3$  ( $D_{\text{NH}_3}$ ) [4] equals the eddy diffusivity and is thereby defined as  $\delta_0 = D_{\text{NH}_3} / \kappa \cdot u_{*g}$ . The upper height of the logarithmic wind profile above the ground surface ( $z_l$ ) was estimated as  $\sim 7$  m from the in-canopy wind profile measurements.  $Sc$  is the Schmidt number, a strong function of the molecular diffusivity of the trace gas, and  $\sim 0.66$  for  $\text{NH}_3$ . Assuming a logarithmic wind velocity profile, the friction velocity above the forest ground ( $u_{*g}$ ) was determined as

$$u_{*g} = \frac{u_{2m} \cdot \kappa}{\ln(2 - z_{0g})} \quad (S4)$$

by using the lowest wind speed measurement available at  $\sim 2$  m a.g.l. and a roughness length at the ground surface ( $z_{0g}$ ) of 0.01 m.

### S2.1. Stomatal and cuticular fluxes

The stomatal resistance ( $R_s$ ) was derived after Weseley et al. (1989) as

$$R_s = \frac{400 \cdot R_{s,min} \cdot \left( \frac{200}{0.1 + G} \right)^2 \cdot \frac{D_{\text{H}_2\text{O}}}{D_{\text{NH}_3}}}{T_c \cdot (40 - T_c)}, \quad (S5)$$

where  $G$  is the global radiation measured above the forest canopy and  $D_{H_2O}$  and  $D_{NH_3}$  are the molecular diffusivities of water and  $NH_3$  in air, respectively [4]. The canopy temperature ( $T_c$ ) was estimated by the average of ambient air temperatures measured at 1.8 m, 7.0 m, and 14.1 m a.g.l.. The minimal stomatal conductance ( $R_{s\_min}$ ) was set to  $130 \text{ s m}^{-1}$ , which is suggested by Weseley et al. (1989) for a coniferous forest in midsummer.

The deposition of  $NH_3$  to the pine needles' cuticles ( $F_{cut}$ ) was determined by the ratio of  $\chi_c$  and the cuticular resistance  $R_{cut}$ :

$$F_{cut} = -\frac{\chi_c}{R_{cut}} \quad (S6)$$

According to Massad et al. (2010),  $R_{cut}$  can be described as a function of the relative humidity and the ratio of acids and bases in ambient air:

$$R_{cut} = \frac{31.5 \cdot e^{a \cdot (100 - rH_c)}}{AR} \quad (S7)$$

The acid ratio ( $AR$ ) was calculated as

$$AR = \frac{2 \cdot \chi_{SO_2} + \chi_{HNO_3} + \chi_{HCl}}{\chi_{NH_3}} \quad (S8)$$

using the mixing ratios measured by the AIM-IC within the forest canopy. In Equation (S7), the in-canopy relative humidity ( $rH_c$ ) was determined by the average of the relative humidity measured at 1.8 m, 7.0 m, and 14.1 m a.g.l.. The parameter  $a$  is given as 0.0318 for forests [2].

The canopy compensation point ( $\chi_c$ ) is needed in both Equation (6) in the main text and Equation (S6) for the determination of the stomatal and cuticular canopy fluxes, respectively. It represents the  $NH_3$  mixing ratio at the pine needle surface, which governs the uptake or release of  $NH_3$  by the stomata and the deposition of  $NH_3$  to the cuticle. Following the compensation point approach described by Nemitz et al. (2001), we reformulated the equation for  $\chi_c$  to be independent from  $NH_3$  measured above the canopy and the above canopy aerodynamic resistance as

$$\chi_c = \frac{\chi_{z0+d} + \chi_s \cdot \frac{R_b}{R_s}}{1 + \frac{R_b}{R_s} + \frac{R_b}{R_{cut}}} \quad (S9)$$

We assumed that the mixing ratio at the canopy top due ( $\chi_{z0+d}$ ) was similar to the  $NH_3$  mixing ratio measured by the AIM-IC due to the relatively open forest canopy structure. While all other terms in Eq. (S9) are described above, the quasi-laminar boundary layer resistance ( $R_b$ ) which limits the exchange at the pine needle surface was determined as

$$R_b = \frac{2 \cdot \left(\frac{Sc}{Pr}\right)^{\frac{2}{3}}}{\kappa \cdot u_*} \quad (S10)$$

where  $Pr$  is the Prandtl number, defined as the ratio between momentum and thermal diffusivities (for air  $\approx 0.72$ ).

## References

- [1] W. J. Shuttleworth and J. S. Wallace, "Evaporation from sparse crops-an energy combination theory," *Q. J. R. Meteorol. Soc.*, vol. 111, no. 465, pp. 839–855, 1985.
- [2] R. S. Massad, E. Nemitz, and M. A. Sutton, "Review and parameterisation of bi-directional ammonia exchange between vegetation and the atmosphere," *Atmos. Chem. Phys.*, vol. 10, no. 21, pp. 10359–10386, 2010.
- [3] P. H. Schuepp, "Turbulent transfer at the ground: On verification of a simple predictive model," *Boundary-Layer Meteorol.*, vol. 12, no. 2, pp. 171–186, 1977.
- [4] W. J. Massman, "A review of the molecular diffusivities of H<sub>2</sub>O, CO<sub>2</sub>, CH<sub>4</sub>, CO, O<sub>3</sub>, SO<sub>2</sub>, NH<sub>3</sub>, N<sub>2</sub>O, NO, AND NO<sub>2</sub> in air, O<sub>2</sub> AND N<sub>2</sub> near STP," *Atmos. Environ.*, vol. 32, no. 6, pp. 1111–1127, 1998.
- [5] E. Nemitz, C. Milford, and M. A. Sutton, "A two-layer canopy compensation point model for describing bi-directional biosphere-atmosphere exchange of ammonia," *Q. J. R. Meteorol. Soc.*, vol. 127, no. 573, pp. 815–833, Apr. 2001.
- [6] M. L. Wesely, "Parameterization of surface resistances to gaseous dry deposition in regional-scale numerical-models," *Atmos. Environ.*, vol. 23, no. 6, pp. 1293–1304, 1989.

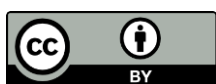

© 2019 by the authors. Submitted for possible open access publication under the terms and conditions of the Creative Commons Attribution (CC BY) license (<http://creativecommons.org/licenses/by/4.0/>).
